# Supplementary material for: Proteomics-based Refinement of Deinococcus deserti Genome Annotation Reveals an Unwonted Use of Non-canonical Translation Initiation Codons
Source: PubMed Central journal article supplement — Mol Cell Proteomics. 2009 Oct 29;9(2):415–26. doi: 10.1074/mcp.M900359-MCP200 (PMC2830850; doi:10.1074/mcp.m900359-mcp200), 2009-10-29
Supplement: supp_M900359-MCP200_NTERP_Supplementary_figures.pdf [file supp_M900359-MCP200_NTERP_Supplementary_figures.pdf]

# Figure S2

>gi|226354810:754223-754855 *Deinococcus deserti* VCD115, complete genome

**GTG**ATAAAC**ATA**GCGAAAGAACACAAGGTCAACGAGCAAATCCGCGTCCGCCAG**ATC**AGGCTTATCGGCGGCGAAGGCGAGCAGATCGGCATC**ATC**GAC

1 M I N I A K E H K V N E Q I R V R Q I R L I G G E G E Q I G I I D  
2 **M** A **K** **E** H K V **N** **E** Q I R V R **Q** I R L I G G E G E Q I G I I D

>gi|94984109:1603384-1603998 (R) *Deinococcus geothermalis* DSM11300, complete genome

**GTG**ATAGAC**ATA**GCGAAAGAACATAAGGTCAACGAGCAGATTTCGCGTTCGTCAG**ATT**CGCCTGATCGGCGCTGAAGGCGAGCAGATCGGGATC**ATC**GAC

1 M I D I A K E H K V N E Q I R V R Q I R L I G A E G E Q I G I I D  
2 **M** A **K** **E** H K V **N** **E** Q I R V R **Q** I R L I G A E G E **Q** I **G** I I D

>gi|15805042:2099093-2099731 (R) *Deinococcus radiodurans* R1, complete genome

**GTG**ATAACC**ATA**GCGAAAGATCTTAAGGTCAACGAGCAGATTTCGCGTCCGGCAG**GTC**CGCCTGATCGGCGCGGAAGGGGAGCAGATCGGGATT**ATC**GAT

1 M I T I A K D L K V N E Q I R V R Q V R L I G A E G E Q I G I I D  
2 **M** A **K** D L K V **N** **E** Q I R V R **Q** V R L I G A E G E **Q** I **G** I I D

>gi|46198308:164771-165304 *Thermus thermophilus* HB27, complete genome

**GTG**ATGTAG**ATA**AAGGAGTACCTGACCAACGAACGCATACGCGCCAAACAG**GTC**CGGTCGTCGGTCCCGACGGCAAGCAGCTCGGCATC**ATG**GACACC

1 M D T  
2 V M \* **M** **K** **E** Y L T **N** **E** R I R A K **Q** V R V V **G** P D G K **Q** L **G** I M D T

>gi|227988584:72588-73112 (R) *Thermus aquaticus* Y51MC23, draft genome

**GTG**ATGTAG**ATA**AAGGAGTATCTGACCAACGAGCGCATCCGTGCCAAACAG**GTC**AGGGTGATCGGTGCCGACGGCCAGCAGCTGGGCATC**ATG**GACACC

1 M R V I G A D G Q Q L G I M D T  
2 V M \* **M** **K** **E** Y L T **N** **E** R I R A K **Q** V R V I G A D G Q Q L G I M D T

**Figure S2: Alignment of IF-3 orthologs.** *Deide\_06380*, *Dgeo\_1509*, *DR\_2087*, *TT\_C0183* and *TaqDRAFT\_3586* loci are shown from top to the bottom. Previously annotated and corrected protein sequences are labelled (1) and (2), respectively. Previously annotated initiation codons (as they appeared in Genbank) and their counterparts in other genomes are shown in bold red and blue, respectively. The new proposed non-canonical initiation codons are underlined. The *Deide\_06380* amino acid sequence uncovered by LC-MS/MS data is underlined. Conserved amino acids are indicated in bold. Note that the *TT\_C0183* protein (Q9ACJ8) is correctly annotated in the current swissprot database release based on remarks done by Wolfrum A et al. (2003) Protein Expression and Purification 29:15-23.

# Figure S3

```

>gi|226354810:682860-684161 (R) Deinococcus deserti VCD115, complete genome
ATGTTCCGCGCGTCGCCCGCCCTGCCTCCATTCCCACCCAGCGCGCTGCTGGTTGGTGGCGCGGCGCGTGA//GTGCCGGACCCG
1
M P D P
2
M F R R R P P L P P F P P S A L L V G G A A R D//V P D P

>gi|94554390:654070-655371 (R) Deinococcus geothermalis DSM11300, complete genome
ATGTTCCGGCGCCGCCCTCCCCTCCCCCTTCCCACGGGCGCGCTGCTGGTTCGGCGGTGCTGCGCGGACTGGCTGCGG
1
M F R R R P P L P P F P T G A L L V G G A A R D W L R

>gi|11612676:1199855-1201159 Deinococcus radiodurans R1, complete genome
ATGTTTCGTCGCCGTCCGCCCTGCCGCCGTTTCCTCCAGGCGCTGCCCTGGTCGGCGGCGCGGTGCGGGACTGGCTGCGC
1
M F R R R P P L P P F P P G A A L V G G A V R D W L R

>gi|227986969 :466647-467912 (R) Meiothermus silvanus DSM9946, draft genome
ATCCGCAGGGTTTCATCTGTCCCCTTTTCCCTTTTCCCTGCTCAAGGATACCTCGTAGGTGGCGCGGTGCGGGATCTGATGCTG
1
M R D L M L
2
M R R V H L S P F P F P A Q G Y L V G G A V R D L M L

>gi|46198308:542569-543873 (R) Thermus thermophilus HB27, complete genome
GTGGCCCATATGGACTTCCCCTTTTATACCCCAAGGACGCCTTCCCCTGGGCGGGCAGTGCGGGACCTCCTCCTGGGA
1
M A H M D F P F Y T P K D A F P V G G A V R D L L L G

>gi|206900094:1348597-1350006 Dictyoglomus thermophilum H-6-12, complete genome
ATGGAGCAAGA//AAGAGTATTCAAAAATTTACGAGATTACACCCTATATAGTAGGTGGCTTCATCAGAGATTATCTATTA
1
M E Q E//K E Y S K I Y E I T P Y I V G G F I R D Y L L

>gi|52696111 PcnB from Aquifex aeolicus (PDB code: 1VFG)
1
V G Q I A K E M G L R A Y I V G G V V R D I L L
Alpha-Helix n°1 Beta-strand n°1 Alpha-Helix n°2

```

**Figure S3: N-termini of PcnB from the *Deinococcus-Thermus* phylum.** *Deide\_05850*, *Dgeo\_0612*, *DR\_1191*, *MesiIDRAFT\_04540*, *TTC\_0556* and *DICTH\_1410* loci are shown from top to the bottom. The N-terminal sequence of PcnB from *Aquifex aeolicus* is also shown, as well as the corresponding secondary structure elements. Previously annotated and corrected protein sequences are labelled (1) and (2), respectively. Previously wrongly annotated initiators are shown in blue while correct translation initiation condons are in red. Conserved amino acids are indicated in bold.

**Figure S4**

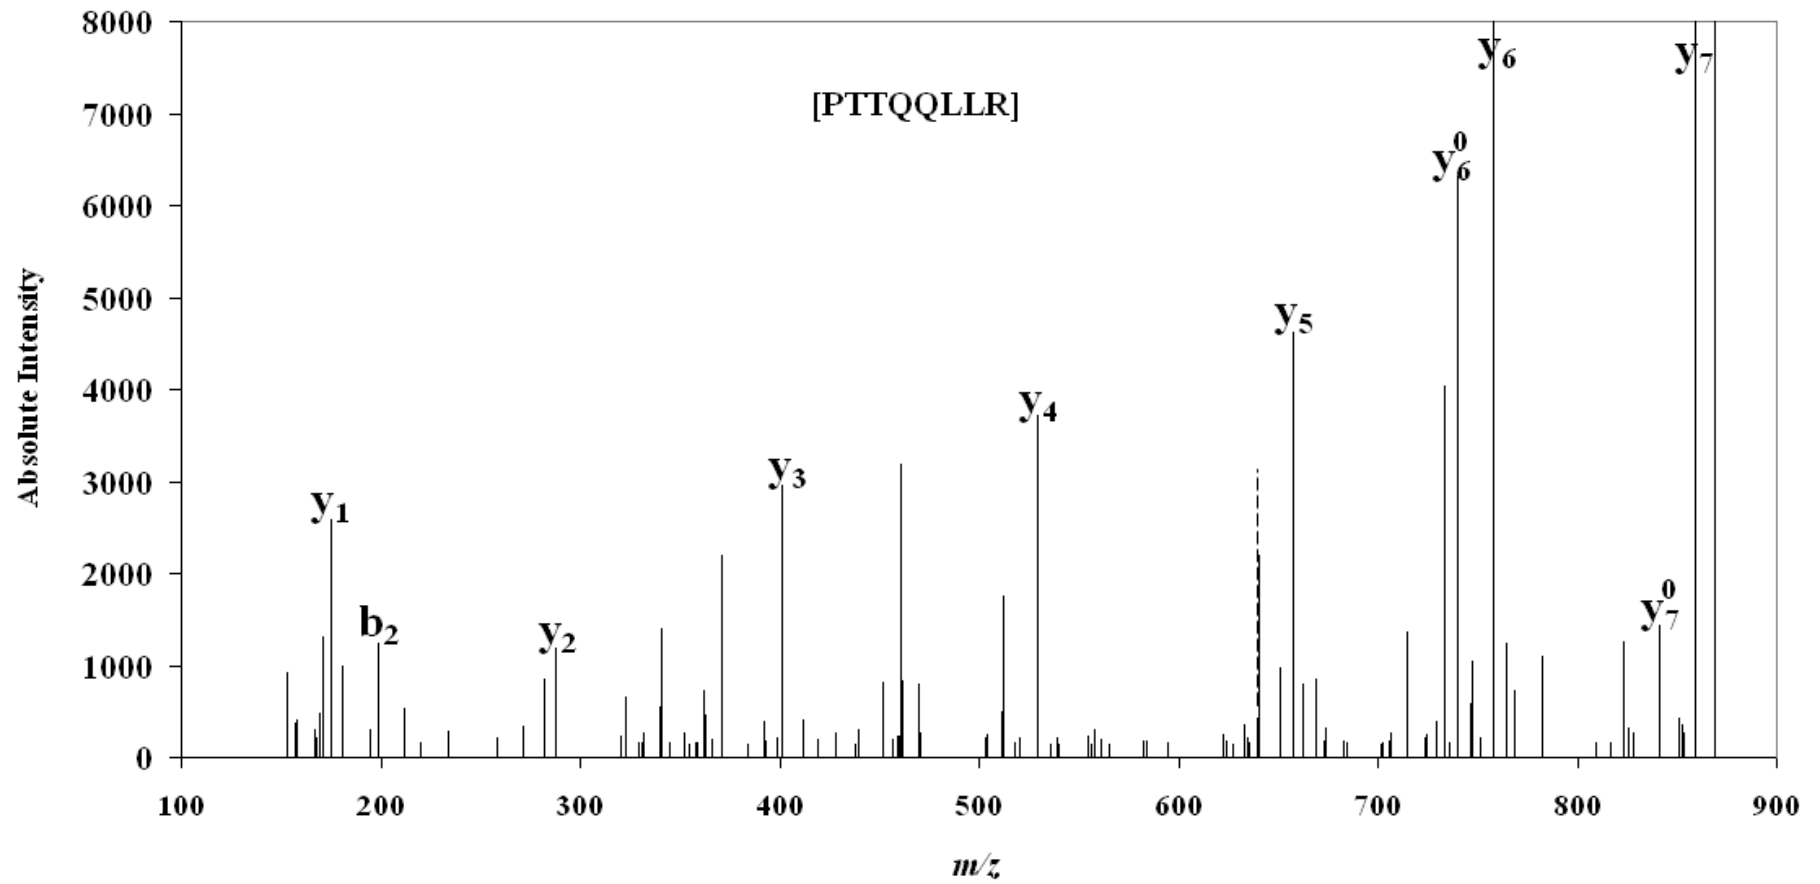

**Figure S4: MS/MS spectrum of the [PTTQQLLR] peptide corresponding to the N-terminal-most peptide of Deide\_19010 (RpsL).**

# Figure S5

>gi|226354810:2291296-2291697 (R) *Deinococcus deserti* VCD115, complete genome  
 TGAT**TTT**ACT**CTG**CCTACCACCCAGCAGCTGCTCCGTAAGGGGCGCACCACGCTCCAGAAGAAGAGCAAAGTTCCGGCCCTGAAGGGC // **GTG**CGTCTG

1 \* F T L M R L  
 2 **M P T T Q Q L L R K G R T T L Q K K S K V P A L K G S //**

>gi|94984109:1970590-1971003 (R) *Deinococcus geothermalis* DSM11300, complete genome  
 TGAT**TTG**ACC**CTG**CCTACCACACAGCAACTGCTCCGTAAGGGGCGCACCACCCTGCAGAAGAAGAGCAAGGTTCCCGCTCTCAAGGGGAGCCCCTTCCGC

1 \* M T L P T T Q Q L L R K G R T T L Q K K S K V P A L K G S P F R  
 2 **M P T T Q Q L L R K G R T T L Q K K S K V P A L K G S P F R**

>gi|15805042:306960-307364 *Deinococcus radiodurans* R1, complete genome  
 AGT**GAT**GTT**TTG**CCTACCACCCAGCAACTTCTGCGTAAGGGCCGCAAGGTTCTCCAGAAAAGAGCAAGGTTCCCGCCCTGAAGGGCAGCCCCTTCCGC

1 S D V M P T T Q Q L L R K G R K V L Q K K S K V P A L K G S P F R  
 2 **M P T T Q Q L L R K G R K V L Q K K S K V P A L K G S P F R**

>gi|46198308:1270800-1271204 (R) *Thermus thermophilus* HB27, complete genome  
 GTG**GTG**GCA**CTG**CCGACGATCAATCAGCTCGTCCGAAAGGGCCGCGAGAAGGTCCGCAAAAAGAGCAAGGTTCCGGCGCTGAAGGGGGCGCCCTTCCGC

1 V M A L P T I N Q L V R K G R E K V R K K S K V P A L K G A P F R  
 2 **M P T I N Q L V R K G R E K V R K K S K V P A L K G A P F R**

>gi|218296332:348-785 *Meiothermus silvanus* DSM9946, draft genome  
 GTGGTTACA**CTG**CCAACGATCAACCAACTGCTACGCAAGGGTTCGTGCTCCGGTCAATCAAGAAGAGCAAAGTGCCCGCTTTGAAGGGGAGTCCCTTCCGC

1 V V T L P T I N Q L L R K G R A P V I K K S K V P A L K G S P F R  
 2 **M P T I N Q L L R K G R A P V I K K S K V P A L K G S P F R**

**Figure S5: Alignment of RpsL orthologs.** *Deide\_19010*, *Dgeo\_1873*, *DR\_0305*, *TT\_C1333* and *MesilDRAFT\_16410* loci are shown from top to the bottom. Previously annotated and corrected protein sequences are labelled (1) and (2), respectively. Previously annotated initiation codons (as they appeared in genbank) and their counterparts in other genomes are shown in bold red and blue, respectively. The new proposed non-canonical initiation codons are underlined. The *Deide\_19010* amino acid sequence uncovered by LC-MS/MS data is underlined. Conserved amino acids are indicated in bold. Note that the *TT\_C1333* protein (P61941) is correctly annotated in the current swissprot database release based on a structural work reported by Laurberg M et al. (2008) Nature 454:852-857.

# Figure S6

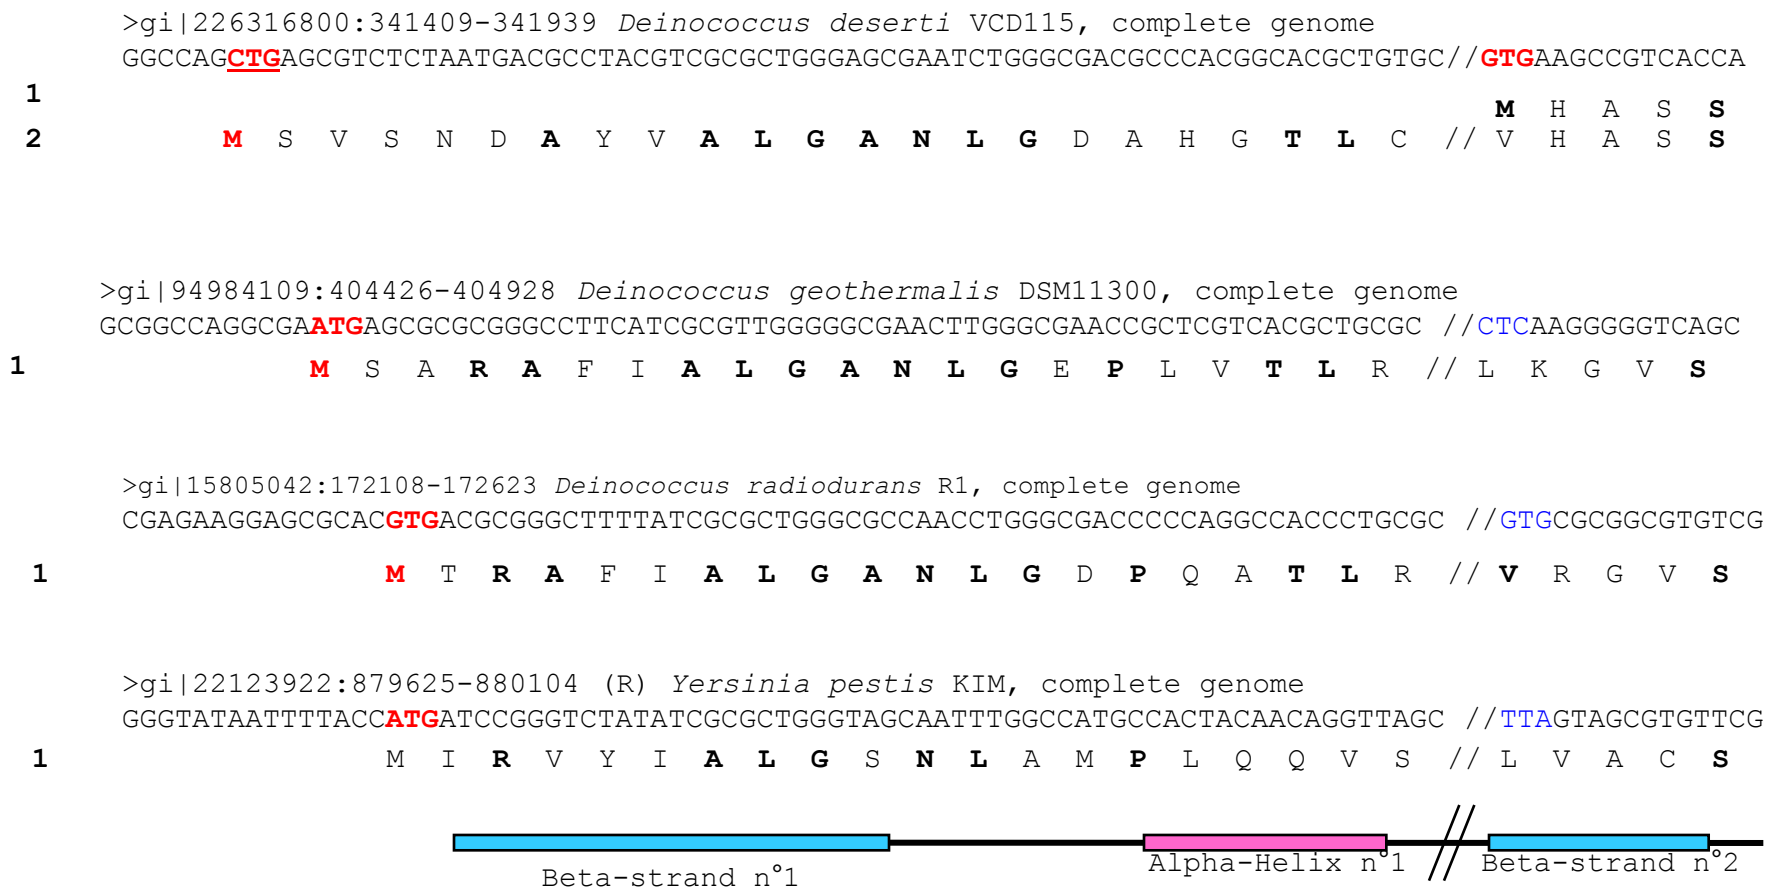

**Figure S6: Alignment of Deide\_03051 orthologs.** *Deide\_03051*, *Dgeo\_0398*, *DR\_0170*, and *y0787 (folK)* loci are shown from top to the bottom. Previously annotated and corrected protein sequences are labelled (1) and (2), respectively. Previously annotated initiation codons and their counterparts in other genomes are shown in red and blue, respectively. The new proposed initiation codon for *Deide\_03051* is underlined (no other possible initiation codon is found upstream). Conserved amino acids are indicated in bold. Secondary elements for FolK from *Yersinia pestis* are indicated (PDB code: 2QX0).
